# Supplementary material
Source: PubMed Central journal article supplement (PMC5938129)

1 **ONLINE REPOSITORY**

2

3 **MATERIALS AND METHODS**

4

5 **Human subjects**

6 All studies were completed under protocol 11-AR-0223, which was approved by  
7 the National Institute of Arthritis and Musculoskeletal and Skin Diseases/National  
8 Institute of Diabetes and Digestive and Kidney Diseases Institutional Review Board.  
9 Written informed consent and assent was obtained for conduct of research, use of  
10 photographic images, and publication of findings.

11

12 **Genetic analysis**

13 Whole human exome sequencing was performed (Otogenetics Corporation) on  
14 patient, parents, and unaffected sister peripheral leukocyte DNA using Agilent 51Mb  
15 Human Exome V5 (Agilent Technologies) capture and PE100-125 Illumina HiSeq2500  
16 (Illumina) sequencing with a 50x average read coverage. A computational pipeline was  
17 developed to process the read data and perform tasks such as quality control (QC),  
18 variant discovery, annotation, and filtering. Briefly, sequence reads were aligned to  
19 human reference genome (GRC Build 37) with Burrows-Wheeler Aligner (BAM). BAM  
20 files were then processed to remove duplicate reads, refine alignment indels and

21 recalibrate base quality scores, according to the best practice guideline by the Genome  
22 Analysis Toolkit (GATK) from the Broad Institute. UnifiedGenotyper from GATK was  
23 used to make joint variant calls across multiple samples, followed by a variant quality  
24 score recalibration step by the GATK VQSR tool. Variants were annotated with  
25 functional impact and allele frequency in public databases and local datasets. Sex and  
26 sample kinship were analyzed to identify potential sample errors and false family  
27 relationships (i.e. erroneous maternity or paternity) using KING software. Possible  
28 disease-causing mutations were selected and prioritized based on quality score, allele  
29 frequency, functional impact, inheritance, and review of literature. While no autosomal  
30 recessive mutations were detected, *de novo* mutations in *MYD88*, *GFPT2*, and *WFIKKN2*  
31 were identified. Considering the critical role of *MYD88* in the immune response and its  
32 relevance to arthritis in animal models<sup>E6-E8</sup> and rheumatoid arthritis,<sup>E10</sup> further efforts  
33 were focused on *MYD88*. Presence (or absence) of *MYD88* S222R mutation was  
34 confirmed by Sanger sequencing (ACGT, Inc.) peripheral leukocyte DNA from all family  
35 members, as well as from isolated CD14+ monocyte, EBV-LCL, and cultured dermal  
36 fibroblast DNA from patient and mother.

37

## 38 **Cell Culture**

39 Human primary dermal fibroblasts were isolated from outgrowth of Dispase  
40 (StemCell Technologies) digested skin biopsies and maintained in DMEM supplemented  
41 with 10% FBS and 100 U/mL Penicillin/Streptomycin (P/S, Gibco). EBV-LCLs were  
42 generated from fresh whole blood and maintained in RPMI 1640 supplemented with 20%

43 FBS and 100 U/mL P/S. THP-1 cells were maintained in RPMI 1640 medium  
44 supplemented 10% FBS and 100 U/mL P/S. Both U2932 and SUDHL2 cell lines were  
45 maintained in RPMI 1640 RPMI 1640 supplemented with 20% Hyclone FBS (GE  
46 Healthcare) and 100 U/mL P/S. All cells listed grown at 37° C with 5% CO<sub>2</sub>.

47

#### 48 **Flow cytometry**

49 Peripheral blood from patient and controls were collected in sodium heparin BD  
50 Vacutainer tubes and used within 1 hour of collection. For immunophenotyping, red  
51 blood cells were lysed with BD Pharm Lyse lysing buffer and washed with PBS.  
52 Remaining cells were fixed with 4% paraformaldehyde, then incubated with specific  
53 antibodies for 1 hour at 4 °C, and then washed. After exclusion of dead cells using  
54 LIVE/DEAD Fixable Red Dead Cell Stain Kit (ThermoFisher Scientific), leukocytes  
55 were identified using the following antibodies (BD Biosciences unless otherwise  
56 specified): anti-CD3 (SK7), anti-CD4 (SK3), anti-CD8 (SK1), anti-CCR6 (11A9), anti-  
57 CD19 (SJ25C1), anti-CD20 (2H7), anti-CD56 (B159), anti-HLA-DR (G46-6), anti-CD16  
58 (B73.1), anti-CD123 (7G3), anti-CD11c (B-ly6), anti-CD14 (MγP9), anti-CD1c (L161;  
59 Biologend), anti-CD303 (201A; Biologend), anti-CD203c (NP4D6; Biologend), and anti-  
60 CD141 (AD5-14H12; Miltenyi). For phosphorylated-STAT3 analysis, peripheral blood  
61 was stained with cell subset-specific antibodies and stimulated with IL-6 50 ng/mL  
62 (PeproTech) for 20 minutes at 37°. Red blood cells were then lysed and remaining cells  
63 fixed for 10 minutes with BD Phosflow Lyse/Fix Buffer, then permeabilized with BD  
64 Phosflow Perm Buffer III. After washes, cells were stained with anti-pSTAT3 (4/P-

65 STAT3) overnight at 4° C. Cell surface markers and p-STAT3 intracellular staining were  
66 measured via BD LSR-Fortessa flow cytometer and analyzed with FlowJo software  
67 v10.1r5.

68

### 69 **Whole blood and dermal fibroblast cytokine/chemokine secretion assays**

70 For whole blood cytokine secretion, peripheral blood from patient and controls  
71 were collected in sodium heparin BD Vacutainer tubes, diluted 1:2 with RPMI 1640  
72 medium (Gibco), and incubated for 22 hours at 37° C within one hour of blood  
73 collection. Supernatants were then collected and stored at -80° C. To assess dermal  
74 fibroblast cytokine secretion,  $1 \times 10^5$  cells/well of patient and mother fibroblasts were  
75 seeded into 12-well plates. After resting overnight, cells were washed with PBS and  
76 media replaced. Supernatants were then collected 24 hours later and stored at -80° C.  
77 Concentrations of supernatant cytokines and chemokines from whole blood and  
78 fibroblasts were subsequently measured via multiplex immunoassay using ProcartaPlex  
79 Human Th1/Th2 & Chemokine Panel 1 20-plex (Affymetrix eBioscience) per  
80 manufacturer's instructions.

81

### 82 **Neutrophil chemotaxis assay**

83 Neutrophil chemotaxis was measured using CytoSelect 96-Well Cell Migration  
84 Assay 3  $\mu$ m (Cell Biolabs, Inc.) per manufacturer's instructions. Briefly, patient and  
85 mother fibroblast conditioned supernatants were generated by seeding  $2.5 \times 10^5$  cells/well

86 into 6 well plates and allowing them to rest at 37° C overnight. The next day, media was  
87 removed and cells washed with PBS. 1 mL of FBS-free DMEM was then placed into  
88 wells and incubated at 37° for 24 hours. Resultant supernatants were then collected and  
89 stored at -80° C. On day of assay, thawed supernatants were placed into feeder wells in  
90 triplicate. Freshly elutriated healthy donor neutrophils were placed into upper chambers  
91 at density of  $5 \times 10^5$ /well after propidium iodide exclusion viability testing. After 4 hours,  
92 migratory cells in feeder wells were lysed, CyQuant GR Fluorescent Dye added, and  
93 quantified using a fluorescence plate reader at 480nm/520nm.

94

#### 95 **Molecular dynamics studies**

96 Four replicate 1.5 microsecond molecular dynamic calculations of the wild type  
97 MyD88 TIR domain (PDB code: 4DOM, Ref. 79) or S222R mutant was performed using  
98 Gromacs with the Charmm36 forcefield, explicit solvent and a 1fs time step. Using  
99 Visual Molecular Dynamics (VMD), 500 snapshots of the last 500 ns of each simulation  
100 were superposed based on the backbone atoms of the central beta sheet, and these  
101 superposed structures were clustered in 5 groups based only on the position of the alpha  
102 C-helix (residues 243-255) backbone atoms using an rmsd distance function with 1.5 Å  
103 cutoff. For cluster analysis of the alpha C helix, all four replicates were analyzed  
104 separately. In these analyses, the most populated clusters contain >60% of all clustered  
105 structures.

106

#### 107 **THP-1 Cell lines, retroviral transduction, and NF-κB reporter system**

108 THP1-Dual KO-MyD Cells (Invivogen), where MyD88 gene expression is  
109 knocked-out via nuclease technology, was retroviral transduced sequentially with N-  
110 terminal MyD88-AU1, then C-terminal MyD88-GFP constructs.<sup>4</sup> Vectors were packaged  
111 into vesicular stomatitis virus envelope (VSV-G) containing retroviral particles (Alstem)  
112 and THP-1 cells transduced overnight at MOI=5. Successfully transduced cells were  
113 isolated via Ly-2 magnetic bead selection (Miltenyi) and purity of both MyD88-AU1 and  
114 MyD88-GFP cells were verified via flow cytometry (Ly-2) and immunoblot for MyD88.  
115 THP-1 clones produced for this study were MyD88 KO clones re-expressing equal  
116 amounts of WT MyD88 with two different tags (WT-MyD88-AU1 and WT-MyD88-  
117 GFP), WT MyD88 and S222R MyD88 with AU1 and GFP tags, respectively (WT-  
118 MyD88-AU1 and S222R-MyD88-GFP), WT MyD88 and S222R MyD88 with the  
119 alternative tags (S222R-MyD88-AU1 and WT-MyD88-GFP), and S222R MyD88 with  
120 two different tags (S222R-MyD88-AU1 and S222R-MyD88-GFP). THP1-Dual KO-MyD  
121 Cells used contain stable integration of secreted embryonic alkaline phosphatase (SEAP)  
122 reporter gene containing IFN- $\beta$  minimal promoter fused to five copies of the NF- $\kappa$ B  
123 consensus response element and three copies of the c-Rel binding site. Baseline  
124 (unstimulated) SEAP over a 24-hour period was detected via enzyme-substrate driven  
125 colorimetry per manufacturer's instructions (Invivogen).

126

### 127 **Proximity ligation assay (PLA)**

128 THP-1 cells were attached to coverslips with phorbol 12-myristate 13-acetate  
129 (PMA, 10 ng/mL) for 24 hours and then allowed to rest in fresh complete RPMI media  
130 for at least 72 hours. PLA was performed on THP-1 double transduced clones (above)

131 using Duolink In Situ Orange Mouse/Rabbit kit (Sigma) per manufacturer's instructions.  
132 Briefly, cells were washed with HBSS, fixed with 4% paraformaldehyde (Electron  
133 Microscopy Sciences) in PBS for 15 minutes, and subsequently permeabilized/washed  
134 with 0.04% saponin (Calbiochem). After 1 hour blocking in 1% BSA (Sigma), 2% horse  
135 serum (Abcam), 3% donkey goat serum (Abcam), 0.04% saponin, and 0.01% sodium  
136 azide (Sigma), cells were incubated for 16 hours at 4° C with rabbit anti-GFP antibody  
137 (Abcam, ab290) and mouse anti-AU1 (Biolegend) both at 1:1000 in blocking solution.  
138 Next, cells were washed with 0.04% saponin in PBS and incubated with anti-rabbit PLUS  
139 and anti-mouse MINUS for 1 hour. Then, cells were subject to ligation for 30 minutes  
140 and then amplification for 100 minutes. Cells were mounted with the kit's DAPI-  
141 containing medium. Per cell clone, confocal images were taken from 4 randomly selected  
142 fields using 63x objective, then maximum projection images were produced from 14 z-  
143 slices. Identical imaging settings were used for all images. PLA events were quantitated  
144 using CellProfiler v2.2 Spot Detection pipeline ([https://github.com/tischi/cellprofiler-  
145 practical-NeuBIAS-Lisbon-2017/blob/master/practical-handout.md](https://github.com/tischi/cellprofiler-practical-NeuBIAS-Lisbon-2017/blob/master/practical-handout.md)) from maximum  
146 projection images collected. For each experiment of each clone, at least 65 cells were  
147 counted in each of 4 field-of-views, or at least 260 cells for all 4 fields-of-view total.

148

#### 149 **Cell lysis, antibodies, and immunoblotting**

150 Cells were lysed in buffer containing 20 mM Tris-Cl pH 7.5, 100 mM NaCl, 10  
151 mM EDTA, 1% triton x-100, protease inhibitor cocktail (Roche), 0.04% NaN<sub>3</sub>, 0.5 mM  
152 PMSF, 1 mM Na<sub>3</sub>VO<sub>4</sub>, 10 mM NaF, and 10 mM sodium pyrophosphate dibasic. After  
153 Bradford protein concentration measurement and normalization of protein amounts,

154 samples were added to SDS loading buffer and heated to 95° C for 3 minutes. After  
155 PAGE (4-20% Criterion TGX, Bio-Rad), proteins were transferred to PVDF membranes  
156 (Bio-Rad), blocked with 5% BSA, and incubated overnight with primary antibodies at 4°  
157 C. Horseradish peroxidase (HRP) conjugated anti-rabbit IgG or anti-mouse IgG (R & D  
158 Systems) secondary antibodies were used with Pierce ECL or West Pico (Thermo  
159 Scientific) to detect protein expression and visualized with Amersham Hyperfilm (GE) or  
160 Bio-Rad ChemiDoc Imaging System. Primary antibodies used: mouse anti-vinculin  
161 (V284, Millipore), mouse anti-GAPDH (Santa Cruz Biotech, clone 6C5, sc-32233),  
162 mouse anti-beta actin (Abcam, ab8226), rabbit, anti-beta tubulin (Abcam, ab6046), rabbit  
163 anti-MYD88 (D80F5), rabbit anti-A20/TNFAIP3 (D13H3), rabbit anti-TIRAP (Abcam,  
164 ab17218), and rabbit anti-NF-κB p65 (D14E12) (all from Cell Signaling Technology  
165 unless otherwise noted). Quantification of immunoblots are densitometric values  
166 performed using ImageJ.

167

#### 168 **SUDHL2, U2932, and EBV B lymphoblastoid (EBV-LCL) p-STAT3 studies**

169 SUDHL2, U2932, and EBV-LCLs used in this study were maintained at cell  
170 density of  $0.8-1 \times 10^6$  cells/mL. Media changes for EBV B lymphoblastoids was performed  
171 by removing 50% of media and replacing it with an equal amount of fresh media every 3  
172 days. Supernatant testing for cytokines in all cases was performed immediately before  
173 media changes. IRAK4 inhibition of EBV-LCLs was accomplished using 200 nM IRAK4  
174 inhibitor AS2444697 (Sigma) for 16 hours, which had no effect on viability as  
175 determined by propidium iodide exclusion.



176 For conditioned-media P-STAT3-induction experiments, U2932 were pre-treated  
177 with their own growth media containing either nothing, human serum IgG (Sigma) 200  
178 ng/mL, or tocilizumab 200 ng/mL (TCZ; Actemra, Genentech) for 2 hours. Next, cells  
179 were centrifuged and resuspended in their own warmed media (U2932-conditioned) or  
180 SUDHL2-conditioned media also containing nothing, human IgG, or TCZ. After 2 hours,  
181 cells were lysed for protein and probed for loading control GAPDH, STAT3 (Cell  
182 Signaling Technology, clone 124H6, #9139), and P-STAT3 (Y705) (Cell Signaling  
183 Technology, clone D3A7, #9145). Similarly, unrelated healthy control EBV-LCLs were  
184 pre-treated with their own growth media containing either nothing, human serum IgG 200  
185 ng/mL, or TCZ 200 ng/mL for 2 hours. Next, cells were centrifuged and resuspended in  
186 either its own warmed media, mother's EBV-LCL conditioned media, or patient's EBV-  
187 LCL conditioned media also containing nothing, human IgG 200 ng/mL, or TCZ 200  
188 ng/mL. After 2 hours, cells were lysed for protein and probed for loading control  
189 GAPDH, STAT3, and P-STAT3. For all STAT3 immunoblots, quantification of p-  
190 STAT3/STAT3 was calculated by dividing GAPDH-normalized p-STAT3 from one gel  
191 by GAPDH-normalized STAT3 from another gel. Protein levels were determined by  
192 densitometry using ImageJ.

193

#### 194 **RNA isolation, cDNA synthesis, and gene expression analysis**

195 In all cases, total RNA was isolated via phenol-chloroform extraction (Life  
196 Technologies), and purity and quantity was assessed by NanoDrop 8000  
197 Spectrophotometer (ThermoFisher Scientific). cDNA was produced via reverse  
198 transcription of 1000 ng of RNA using iScript cDNA Synthesis Kit (Bio-Rad). qPCR was

199 performed on QuantStudio 6 Plex (Applied Biosystems) using 40 ng cDNA template,  
200 oligonucleotide primers, and SsoFast EvaGreen Supermix (Bio-Rad). For qPCR, gene  
201 expression relative to the housekeeping genes *PPIA* and *HPRT1* was calculated using  
202 comparative Ct method. Oligonucleotide primer sequences are available upon request.  
203 NanoString gene expression analysis was performed on total RNA from isolated  
204 peripheral monocytes via both CD14 positive and negative selection, and cultured dermal  
205 fibroblasts, using nCounter Human Inflammation v2 pre-built CodeSet (NanoString  
206 Technologies) per manufacturer's instructions. Briefly, 200 ng total RNA was hybridized  
207 with Capture and Reporter probes in thermocycler at 65° C for 24 hours. Samples were  
208 then loaded onto nCounter Cartridge using nCounter Prep Station and RNA counted by  
209 the Digital Analyzer. After quality control checks, normalized RNA counts were  
210 generated by negative control subtraction and geometric mean of housekeeping genes  
211 *TUBB*, *PGK1*, *GUSB*, *HPRT1*, *CLTC*, and *GAPDH* using nSolver Analysis Software  
212 v2.5. Genes were considered not expressed if normalized RNA counts were less than  
213 twice the standard deviation of the negative control counts in both patient and controls.

214

#### 215 **siRNA-mediated protein knockdown**

216 Protein knockdown was performed using Amaxa Nucleofector II with Human  
217 Dermal Fibroblast Nucleofector Kit (Lonza) per manufacturer's protocol. Briefly, after  
218 cell dissociation using Accutase (Life Technologies),  $6-7 \times 10^5$  patient or mother dermal  
219 fibroblasts were resuspended in 100  $\mu$ L Human Dermal Fibroblast Nucleofector Solution,  
220 siRNA added, nucleofected using program U-023, and then divided into 3 wells of a 6-

221 well plate containing pre-warmed DMEM supplemented with 10% FBS. After 80 hours,  
222 cells were lysed for protein and RNA analysis. siRNA (Ambion) and final concentrations  
223 used are as follows: *MYD88* (s9138), 30 nM; *TNFAIP3* (s14260), 1000 nM; *RELA*  
224 (s11914), 1000 nM; *TIRAP* (s195607), 1000 nM; and Negative Control (4390843), 1000  
225 nM. Percent knockdown compared to negative control siRNA was calculated by  
226 densitometry of patient fibroblast protein expression using ImageJ (NIH).

227

## 228 **Statistical analysis**

229 GraphPad Prism 6 software was used for all statistical calculations. Statistical  
230 significance was determined using unpaired Student's t test. Differences with p-values <  
231 0.05 (\*), < 0.01 (\*\*), <0.001 (\*\*\*), and <0.0001 (\*\*\*\*) were considered significant.

232

## 233 **REFERENCES**

- 234 E1. Picozza M, Battistini L, Borsellino G. Mononuclear phagocytes and marker  
235 modulation: when CD16 disappears, CD38 takes the stage. *Blood*. 2013;122(3):456-457.
- 236 E2. Coornaert B, Carpentier I, Beyaert R. A20: central gatekeeper in inflammation and  
237 immunity. *J Biol Chem*. 2010;284(13):8217-8221.
- 238 E3. Wang JQ, Jeelall YS, Beutler B, Horikawa K, Goodnow CC. Consequences of the  
239 recurrent MYD88 (L265P) somatic mutation for B cell tolerance. *J Exp Med*.  
240 2014;211(3):413-426.

241 E4. Lam LT, Wright G, Davis RE, Lenz G, Farinha P, Dang L, et al. Cooperative  
242 signaling through the signal transducer and activator of transcription 3 and nuclear factor-  
243 kB pathways in subtypes of diffuse large B-cell lymphoma. *Blood*. 2008;111(7):3701-  
244 313.

245 E5. Compagno M, Lim WK, Grunn A, Nandula SV, Brahmachary M, Shen Q, et al.  
246 Mutations of multiple genes cause deregulation of NF-kappaB in diffuse large B-cell  
247 lymphoma. *Nature*. 2009;459(7247):717-721.

248 E6. Joosten LA, Koenders MI, Smeets RL, Heuvelmans-Jacobs M, Helsen MM, Takeda  
249 K, et al. Toll-like receptor 2 pathway drives streptococcal cell wall-induced joint  
250 inflammation: critical role of myeloid differentiation factor 88. *J Immunol*.  
251 2003;171(11):6145-6153.

252 E7. Choe JY, Crain B, Wu SR, Corr M. Interleukin 1 receptor dependence of serum  
253 transferred arthritis can be circumvented by toll-like receptor 4 signaling. *J Exp Med*.  
254 2003;197(4):537-542.

255 E8. Matmati M, Jacques P, Maelfait J, Verheugen E, Kool M, Sze M, et al. A20  
256 (TNFAIP3) deficiency in myeloid cells triggers erosive polyarthritis resembling  
257 rheumatoid arthritis. *Nat Genet*. 2011;43(9):908-912.

258 E9. Abdollahi-Roodsaz S, van de Loo FA, Koenders MI, Helsen MM, Walgreen B, van  
259 den Bersselaar LA, et al. Destructive role of myeloid differentiation factor 88 and  
260 protective role of TRIF in interleukin-17-dependent arthritis in mice. *Arthritis Rheum*.  
261 2012;64(6):1838-1847.

262 E10. Elshabrawy HA, Essani AE, Szekanecz Z, Fox DA, Shahrara S. TLRs, future  
263 potential therapeutic targets for RA. *Autoimmun Rev*. 2017;16(2):103-113.

264

265 **TABLE E1.** Summary of patient clinical laboratory values and peripheral leukocyte  
266 immunophenotyping. Subject laboratory values over span of 3 years given as a range.  
267 Reference range defined as range of normal values according to National Institutes of  
268 Health Clinical Center Department of Laboratory Medicine. Immunophenotyping data  
269 presented as mean (range of 3 values over span of 27 months).

270

271 **FIG E1.** Genotype of pedigree and patient CD14+ monocytes, dermal fibroblasts, and  
272 EBV-LCLs. **A**, Sanger sequencing chromatograms of peripheral leukocyte DNA. P,  
273 patient; M, mother; F, father; S, sister. **B**, Sanger sequencing chromatograms  
274 demonstrating the presence of c.666T>G mutation in patient CD14+ monocytes, dermal  
275 fibroblasts, and EBV B lymphoblastoids.

276

277 **FIG E2.** Immunophenotyping of peripheral blood dendritic cells. CD1c (BDCA-1),  
278 CD303 (BDCA-2), CD141 (BDCA-3), and CD203c surface expression for  
279 CD123+CD11c- (Q1), CD123+CD11c+ (Q2), and CD123-CD11c+ (Q3) dendritic cells.  
280 Positive control CD203c+ cells were gated from HLA-DR+ myeloid fraction of  
281 peripheral leukocytes.

282

283 **FIG E3.** Molecular dynamics modeling and effect of S222R on MyD88 self-association.  
284 **A**, Molecular dynamics cluster analysis of wild type (left) and S222R (right) MyD88 TIR  
285 domains. Images show superposition of the representative structure for the most  
286 populated cluster for each of 4 independent replicate simulations. **B**, Representative

287 immunoblot showing relative expression of MyD88-AU1 and MyD88-GFP in THP-1  
288 transductants, with vinculin as a loading control. **C**, NF- $\kappa$ B activity measured by secreted  
289 alkaline phosphatase activity as reporter gene. Activity is relative to cells containing WT-  
290 MyD88-AU1 & WT-MyD88-GFP. Each data point represents the average of the median  
291 of 3 replicates from 3 independent experiments. **D**, Representative confocal images of  
292 proximity ligation assay (PLA). Image 1, MyD88-KO; 2, WT-MyD88-AU1 and WT-  
293 MyD88-GFP; 3, WT-MyD88-AU1 and S222R-MyD88-GFP; 4, S222R-MyD88-AU1  
294 and WT-MyD88-GFP; and 5, S222R-MyD88-AU1 and S222R-MyD88-GFP. Blue,  
295 DAPI and red, PLA event using anti-AU1 and anti-GFP antibodies. **E**, Average PLA  
296 events per cell from 3 independent experiments. Error bars represent  $\pm$  SD. \*,  $p < 0.05$ ; \*\*,  
297  $p < 0.01$ ; \*\*\*,  $p < 0.001$ .

298

299 **FIG E4.** Dermal fibroblast neutrophil-attracting chemokine secretion and function. **A**,  
300 unstimulated patient and control fibroblast secretion of CXCL1 and IL-8 over 24 hours.  
301 **B**, unrelated health donor neutrophil chemotaxis over 4 hours in response to patient and  
302 mother fibroblast-conditioned media. P, patient; M, mother. RLU, relative light units. For  
303 **A** and **B**, each data point represents the median of 3 replicates, with results from 3  
304 independent experiments ( $n=3$ ) shown. Error bars represent  $\pm$  SD. \*,  $p < 0.05$ ; \*\*\*\*\*,  
305  $p < 0.0001$ .

306

307 **FIG E5.** SUDHL2 and patient EBV-LCL IL-6 and IL-8 expression, and STAT3  
308 phosphorylation. **A**, Chemokine/cytokine gene and protein expression from U2932 and  
309 SUDHL2 cell lines. **B**, Chemokine/cytokine protein and gene expression from EBV-

310 LCLs, without (Control) and with AS2444697 (200 nM for 16 hours) as indicated. **P**,  
311 Patient; **M**, mother; **HC**, unrelated healthy control. **C**, Levels of P-STAT3 and total  
312 STAT3 in SUDHL2 and U2932 cells. Representative immunoblot (left) with  
313 quantification (right), from 4 independent experiments. Due to marked overexpression of  
314 total STAT3 in SUDHL2 cells, blot was run using 1:10 dilution of SUDHL2 protein  
315 lysate. **D**, Levels of P-STAT3 and total STAT3 in EBV-LCLs from patient (**P**) and  
316 mother (**M**). **E**, STAT3 phosphorylation in U2932 cells in response to 2 hour incubation  
317 with conditioned media from SUDHL2 or U2932 cells. Conditioned media was used  
318 alone, or after human IgG (IgG) or tocilizumab (TCZ; 200 ng/mL) pre-treatment.  
319 Relative STAT3 phosphorylation (P-STAT3) was determined as for **D**. **F**, STAT3  
320 phosphorylation in EBV-LCLs from healthy control (**HC**) in response to conditioned  
321 media from **HC**, mother (**M**), or patient (**P**). Conditioned media was used alone or after  
322 IgG or TCZ pre-treatment, and relative STAT3 phosphorylation determined as described  
323 in **E**. For **D**, **E**, and **F**, GAPDH used as a loading control. Error bars represent  $\pm$  SD. \*,  
324  $p < 0.05$ ; \*\*,  $p < 0.01$ ; \*\*\*,  $p < 0.001$ .

**TABLE E1.** Summary of subject's laboratory values and peripheral leukocyte immunophenotyping

| <b>Laboratory Test</b>                                                                   | <b>Subject's Value Range</b>                                                                 | <b>Reference Range</b>                  |
|------------------------------------------------------------------------------------------|----------------------------------------------------------------------------------------------|-----------------------------------------|
| <i>Total Leukocyte Count</i>                                                             | 6.05-7.25                                                                                    | 3.98-10.04 x10 <sup>3</sup> /uL         |
| <i>Neutrophil %</i>                                                                      | 53.8-57.3                                                                                    | 34-71.1%                                |
| <i>Lymphocyte %</i>                                                                      | 30.5-36.3                                                                                    | 19.3-51.7%                              |
| <i>Monocyte %</i>                                                                        | 7.8-10.2                                                                                     | 4.7-12.5%                               |
| <i>Eosinophils</i>                                                                       | 1.0-2.9                                                                                      | 0.7-5.8%                                |
| <i>Basophils</i>                                                                         | 0.1- 0.5                                                                                     | 0.1-1.2%                                |
| <i>Erythrocyte Sedimentation Rate (ESR)</i>                                              | 5-13                                                                                         | 0-42 mm/hr                              |
| <i>C-reactive Protein (CRP)</i>                                                          | 1.10-7.00                                                                                    | 0-4.99 mg/L                             |
| <i>Osteocalcin</i>                                                                       | 113.8-201.6                                                                                  | 7.3 – 38.5 ng/mL                        |
| <i>Anti-Nuclear Antibodies (ANA)</i>                                                     | Negative                                                                                     | Negative < 0.9 EU                       |
| <i>Anti-ENA Screen (Anti-RNP, Anti-Sm, Anti-SS-A, Anti-SS-B, Anti-Jo-1, Anti-Scl-70)</i> | Negative                                                                                     | Negative < 20 EU                        |
| <i>Anti-Histone / Anti-dsDNA</i>                                                         | Negative / Negative                                                                          | Negative < 1 U / Negative < 30 U        |
| <i>Rheumatoid Factor / Anti-Cyclic Citrullinated Peptide</i>                             | Negative / Negative                                                                          | Negative <15 U / Negative <20 U         |
| <i>Serum C3/C4</i>                                                                       | 128.4/33.5                                                                                   | 90-180/10-40 mg/dL                      |
| <i>Serum IgG/IgM/IgA</i>                                                                 | 619-874/20-39/120-235                                                                        | 716-1711/15-188/47-249 mg/dL            |
| <i>IgG Subclasses, IgG1/IgG2/IgG3/IgG4</i>                                               | 367/140/27/3                                                                                 | 289-934/82-516/20-103.2/0.7-121.7 mg/dL |
| <i>Isohemagglutinins, anti-A/anti-B</i>                                                  | Positive/Positive                                                                            | n/a                                     |
| <i>EBVCA-IgG/IgM/EBNA</i>                                                                | Negative/Negative/Negative                                                                   | Negative < 18 / <36 / <18               |
| <i>CMV Ab IgG/IgM</i>                                                                    | 2.30/Negative                                                                                | Positive > 0.70 U/mL                    |
| <i>Anti-Rubella IgG, Random</i>                                                          | 29.4                                                                                         | Reactive > 10 IU/L                      |
| <i>Mumps Ab IgG, Random</i>                                                              | Negative                                                                                     | Negative < 0.8 AI                       |
| <i>Anti-Rubeola IgG, Random</i>                                                          | Negative                                                                                     | Negative < 25 AU/mL                     |
| <i>Anti-Diphtheria Ab, Random</i>                                                        | > 1.00                                                                                       | Positive > 0.01 IU/mL                   |
| <i>Anti-Haemophilus Influenza Ab, Random</i>                                             | 0.14 (Negative)                                                                              | Positive > 0.15 mg/L                    |
| <i>Anti-Tetanus IgG, Random</i>                                                          | 0.18 (Positive)                                                                              | Positive > 0.01 IU/mL                   |
| <i>Anti-HBs Antibody, Random</i>                                                         | Negative                                                                                     | n/a                                     |
| <i>Anti-Varicella-Zoster Virus IgG, pre-re-vaccination</i>                               | Negative                                                                                     | Negative < 135 Index                    |
| <i>Anti-Varicella-Zoster Virus IgG, post-re-vaccination</i>                              | > 4000                                                                                       | Positive > 165 Index                    |
| <i>Positive anti-Pneumococcal Ab serotypes, Random</i>                                   | 1, 22F                                                                                       | n/a                                     |
| <i>Negative anti-Pneumococcal Ab serotypes, Random</i>                                   | 2, 3, 4, 5, 8, 9N, 12F, 14, 17F, 19F, 20, 22F, 23F, 6B, 10A, 11A, 7F, 15B, 18C, 19A, 9V, 33F | n/a                                     |
| <b>Peripheral leukocyte immunophenotyping</b>                                            |                                                                                              |                                         |
| <i>CD3 (% lymphocytes)</i>                                                               | 73.5% (65.2-80.3)                                                                            | 72.9% (69.6-70.3)                       |
| <i>CD4 (% CD3+)</i>                                                                      | 51.6% (37.8-60.2)                                                                            | 57.1% (40-72.3)                         |
| <i>CD8 (% CD3+)</i>                                                                      | 41.4% (34.7-46.2)                                                                            | 35.9% (26.5-48.3)                       |
| <i>CD19 (% lymphocytes)</i>                                                              | 11.2 (9.94-12.6)                                                                             | 11.7% (6.97-19.5)                       |
| <i>CD20+CD19+IgD-CD27+ Memory B Cells (% CD19+ B Cells)</i>                              | 4.1% (2.41-5.15)                                                                             | 23.3% (22.7-23.8)                       |
| <i>CD20+CD19+IgD+CD27- Naive B Cells (% CD19+ B Cells)</i>                               | 84.1% (79.5-87.2, 85.4)                                                                      | 56.8% (53.7-58.7)                       |
| <i>CD19+CD20-CD27+CD38+ Plasmablasts (% CD19+CD20- B Cells)</i>                          | 2.34% (1.64-2.86)                                                                            | 40.7% (23.1-58.7)                       |
| <i>CD19+CD24+CD38+ Transitional B Cells (% CD19+ B Cells)</i>                            | 5.21% (4.51-6.18)                                                                            | 4.05% (3.33-4.91)                       |
| <i>CD14++CD16- Monocytes (% total monocytes)</i>                                         | 81.1% (76.8-86.1)                                                                            | 75.7% (68.1-80.8)                       |
| <i>CD14+CD16+ Monocytes (% total monocytes)</i>                                          | 0.0022% (0.0038-0.057)                                                                       | 4.93% (2.61-8.66)                       |
| <i>CD14-CD16+ Monocytes (% total monocytes)</i>                                          | 0.0132% (0.0096-0.015)                                                                       | 6.19% (3.78-8.51)                       |
| <i>CD123+CD11c- Plasmacytoid DCs (% total DCs)</i>                                       | 12.7% (2.27-23.5)                                                                            | 37.9% (3.01-56.5)                       |
| <i>CD123-CD11c+ Myeloid DCs (% total DCs)</i>                                            | 43.6% (19.1-88.5)                                                                            | 45.3% (34.4-61.1)                       |
| <i>CD123+CD11c+ DCs (% total DCs)</i>                                                    | 34.4% (8.69-54.3)                                                                            | 0.73% (0.62-0.88)                       |
| <i>CD3+CD4+CCR6+ (Th17) (% CD4 Cells)</i>                                                | 14.3% (9.19-19.7)                                                                            | 8.39% (4.66-12.7)                       |
| <i>CD3+CD4+CD25+CD127- Treg (% CD4+ T Cells)</i>                                         | 7.25% (6.26-8.15)                                                                            | 9.79% (8.49-11.1)                       |



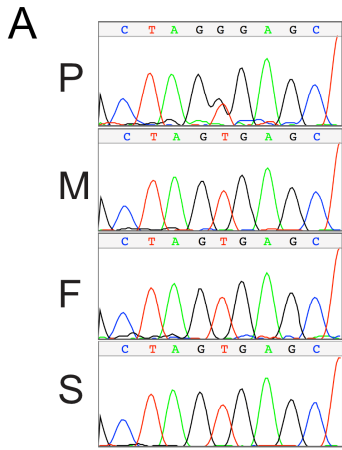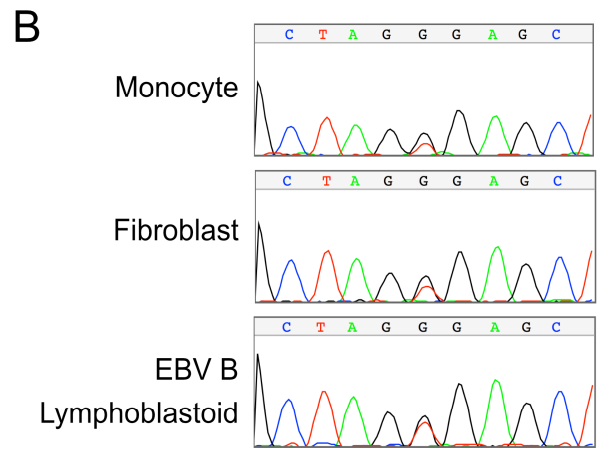

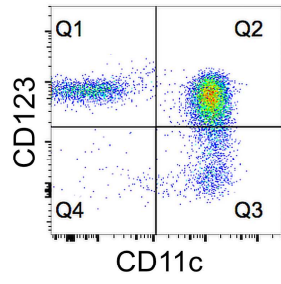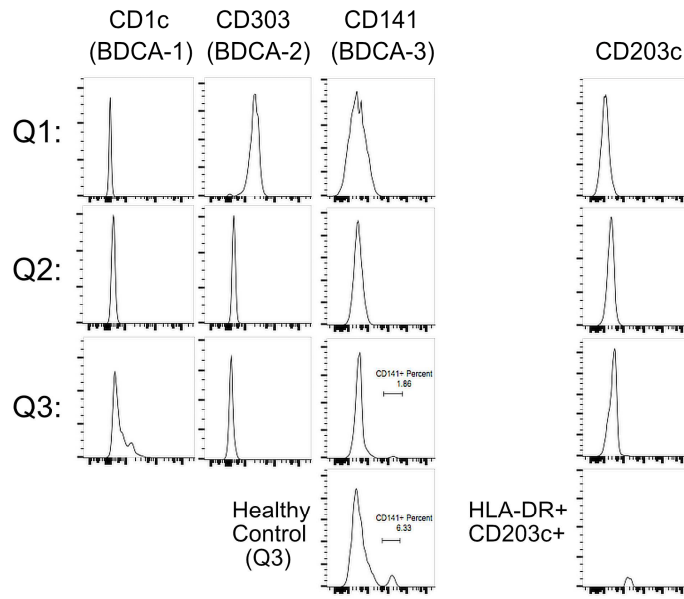

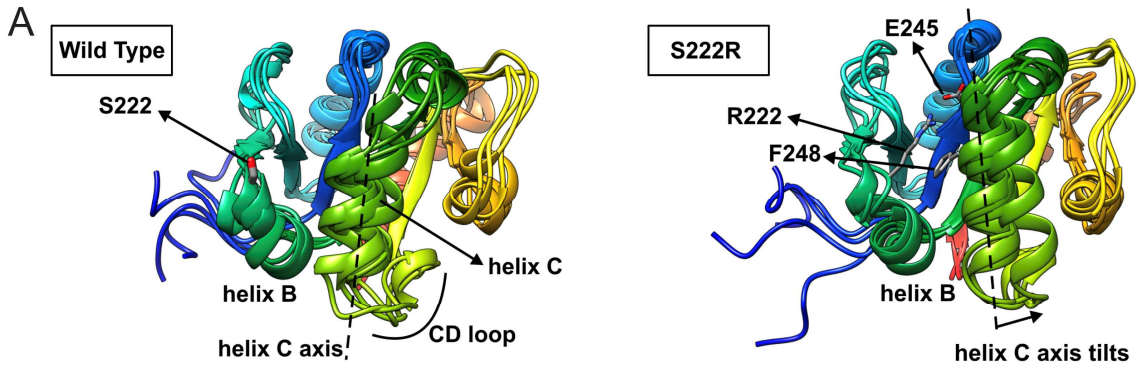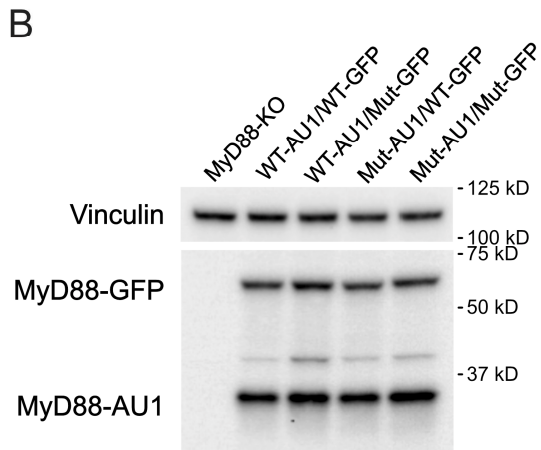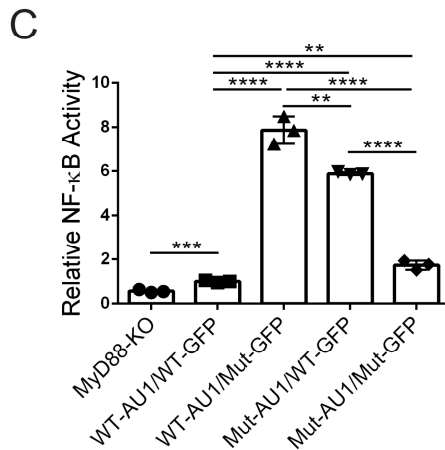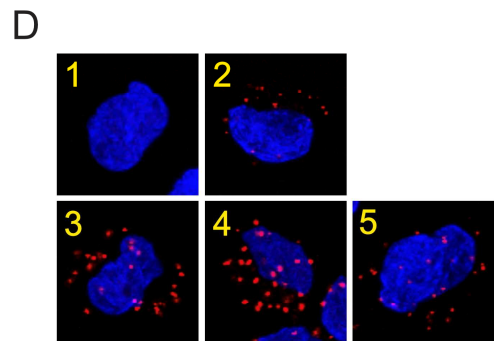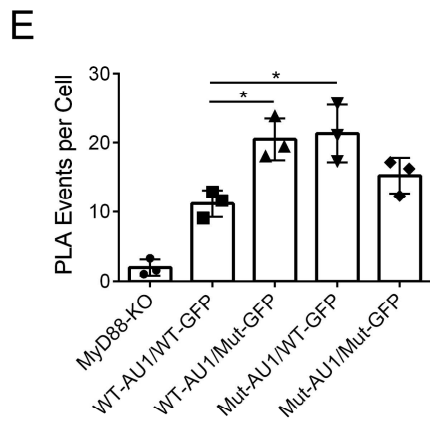

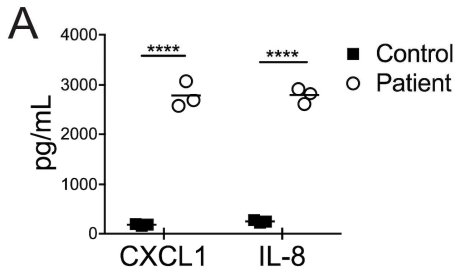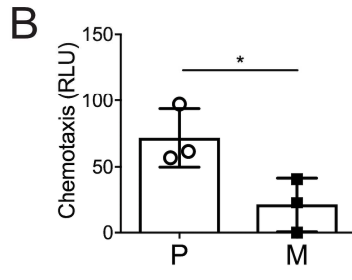

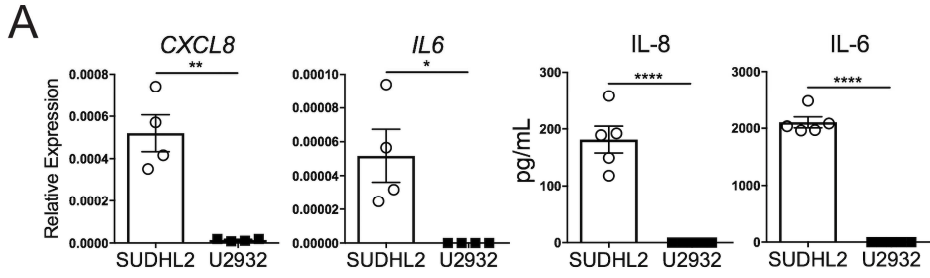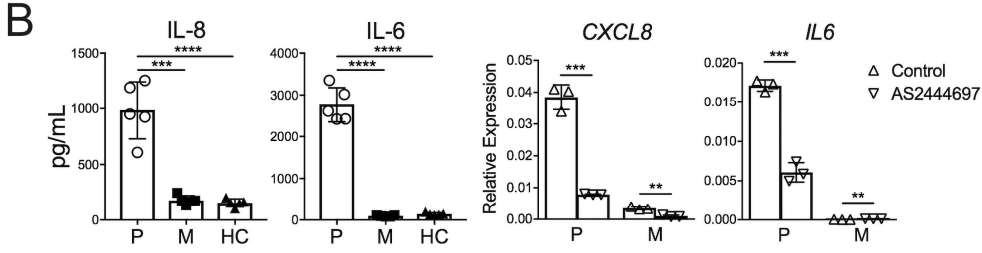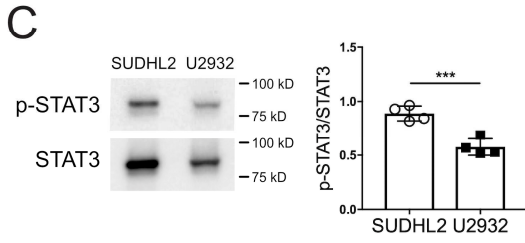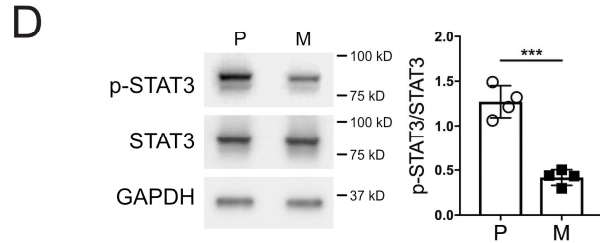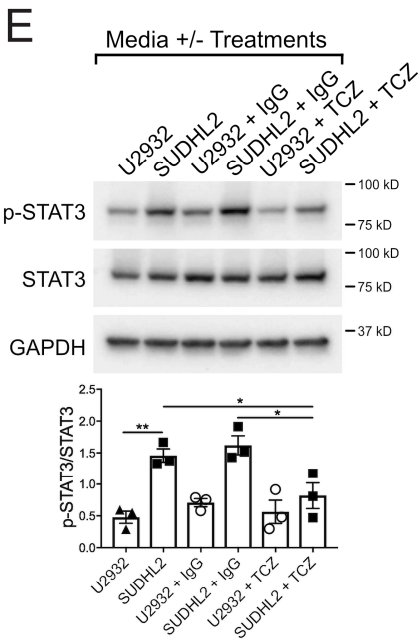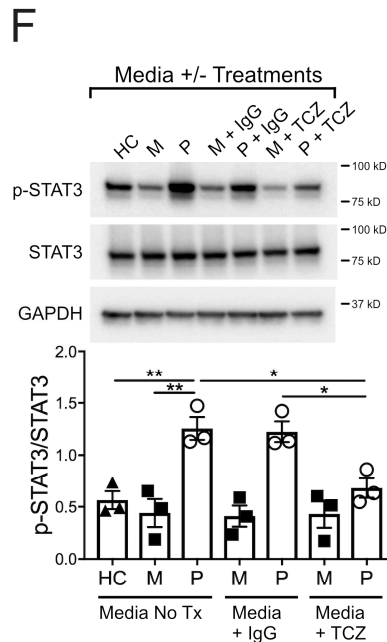

Supplement: NIHMS948854-supplement-supplement_1.pdf [file NIHMS948854-supplement-supplement_1.pdf]
